# Supplementary material for: Organophosphorus Flame Retardant TDCPP Displays Genotoxic and Carcinogenic Risks in Human Liver Cells
Source: MDPI journal article supplement (doi:10.3390/cells11020195), 2022-01-07
Supplement: s1 [file s1]

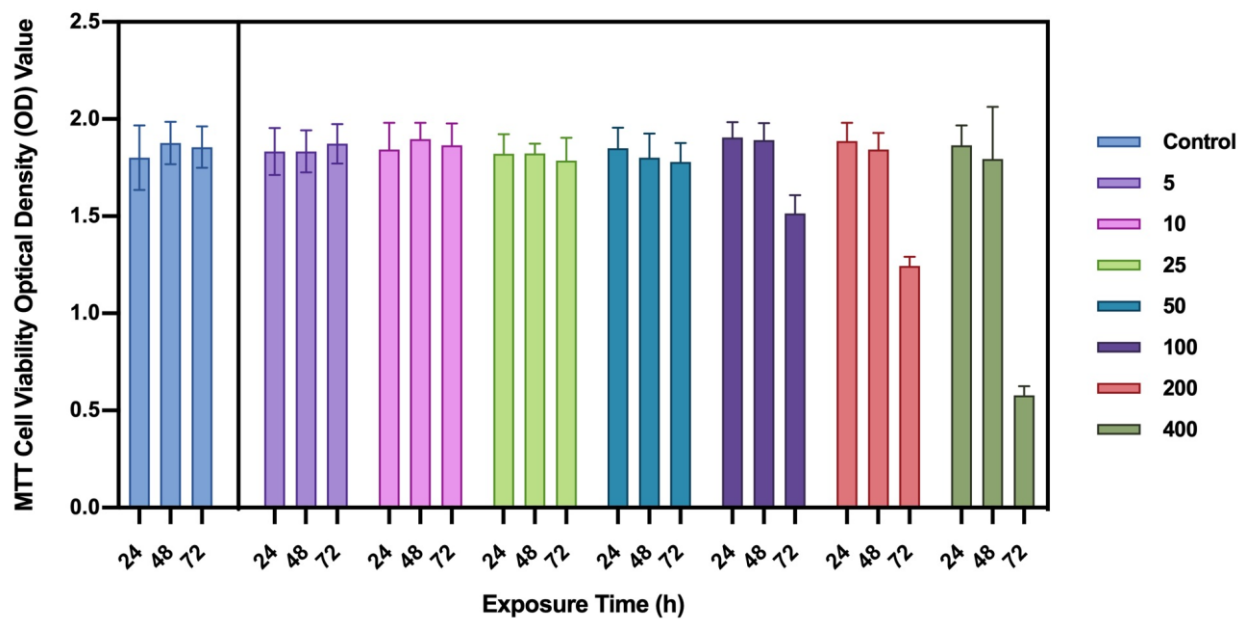

**Supplementary Figure S1:** Effect of TDCPP on HepG2 survival at different time points.

**Supplementary Table S1.** DNA damage analysis using comet assay parameters in TDCPP treated cells after 3 days of exposure.

| Groups                                  | Olive tail moment<br>(Arbitrary Unit) | Tail length<br>( $\mu\text{m}$ ) |
|-----------------------------------------|---------------------------------------|----------------------------------|
| Control                                 | $0.29 \pm 0.05$                       | $46.35 \pm 2.65$                 |
| EMS (2 mM)                              | $11.89 \pm 1.92^{**}$                 | $110.42 \pm 6.83^{**}$           |
| <b>TDCPP (<math>\mu\text{M}</math>)</b> |                                       |                                  |
| 100                                     | $1.90 \pm 0.23^{**}$                  | $54.62 \pm 4.90^{**}$            |
| 200                                     | $4.81 \pm 0.82^{**}$                  | $72.08 \pm 5.43^{**}$            |
| 400                                     | $8.87 \pm 1.33^{**}$                  | $114.56 \pm 7.29^{**}$           |

Data represent the mean  $\pm$  S.D. of three independent experiments done in duplicate.  
 $^{**}p < 0.01$ ; EMS: Ethyl methanesulphonate.

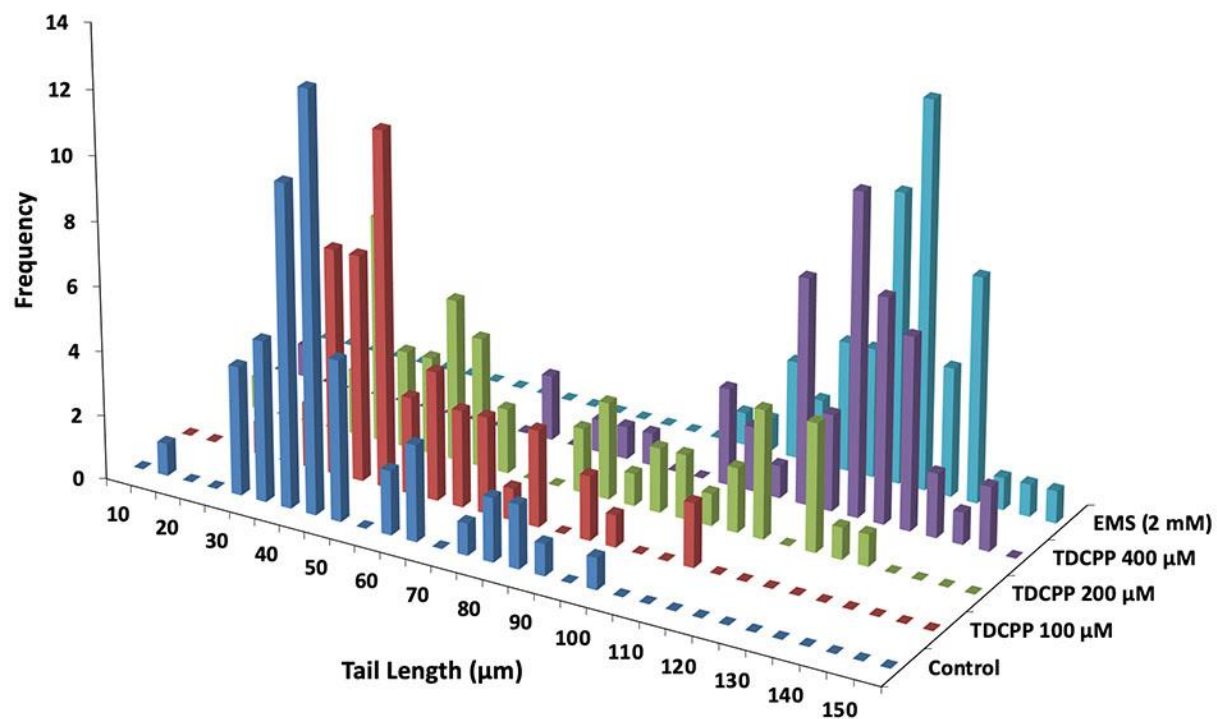

**Supplementary Figure S2:** Frequency distribution of DNA damage in TDCPP exposed cells.
